# Supplementary material
Source: PubMed Central journal article supplement (PMC4241755)
Supplement: NIHMS635203-supplement-sup_data.pdf [file NIHMS635203-supplement-sup_data.pdf]

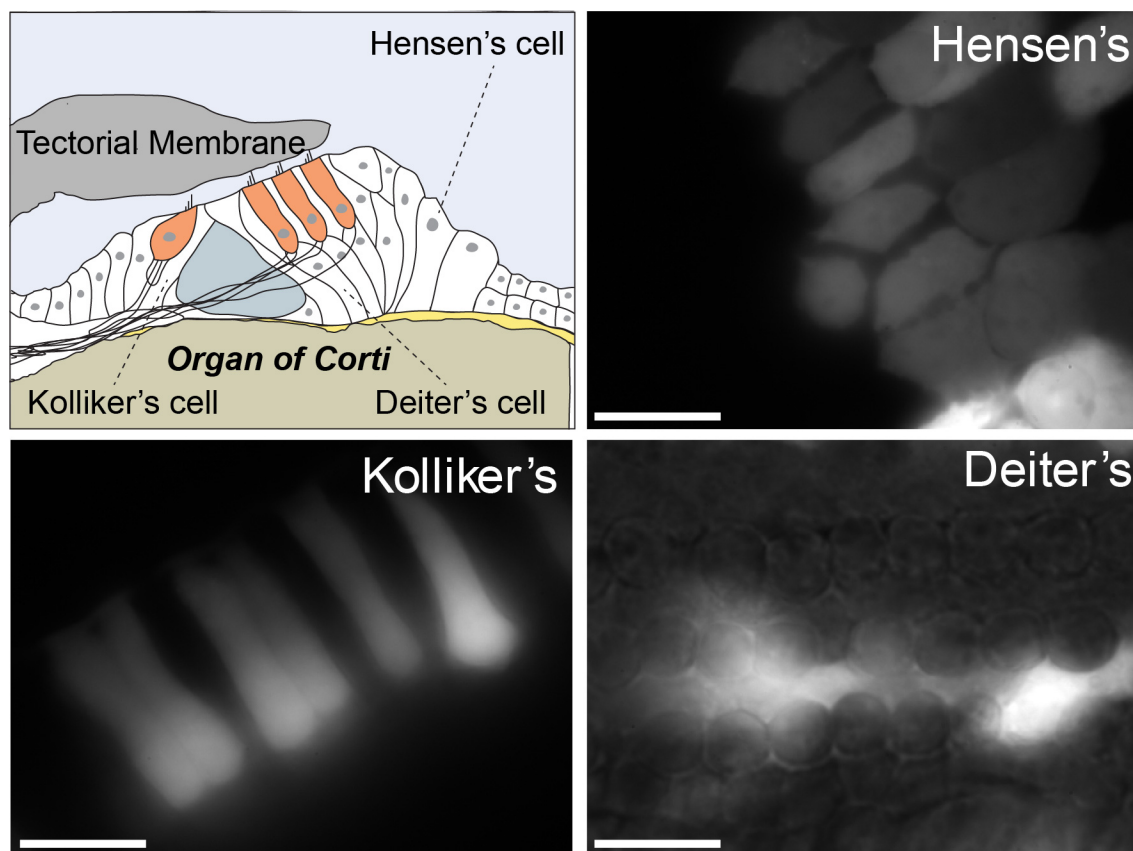

**Gene transfer into supporting cells by injectoporation.** A diagram of a cross section through the organ of Corti is shown as well as the EGFP fluorescence signal in the indicated cell types. Scale bars: 10  $\mu\text{m}$ .
